# Supplementary material for: Non-precious Melamine/Chitosan Composites for the Oxygen Reduction Reaction: Effect of the Transition Metal
Source: Frontiers journal article supplement (doi:10.3389/fmats.2020.578518), 2020-11-26
Supplement: Table_1.docx [file Table_1.docx]

Table 1. Surface elemental contents examined by XPS (wt.%)
